# Supplementary material for: Hybrid immunity in older adults is associated with reduced SARS-CoV-2 infections following BNT162b2 COVID-19 immunisation
Source: Commun Med (Lond). 2023 Jun 16;3:83. doi: 10.1038/s43856-023-00303-y (PMC10275930; doi:10.1038/s43856-023-00303-y)
Supplement: Supplementary file 2 — Supplementary Data 1 [file 43856_2023_303_MOESM2_ESM.csv]

id	age	sex	pre_covid	any_sero_two	prior_evid	vaccine_doses_received	tm1_antiNP	tm1_antiRBD	tm2_antiNP	tm2_antiRBD	tm2_antiRBD.BAUmL	tm2_antiS	tm2_antiS.bin	tm2_antiS.ctg	tm3_antiNP	tm3_antiRBD	tm3_antiRBD.BAUmL	tm3_antiS	tm3_antiS.BAUmL	tm3_antiS.bin	tm3_antiS.ctg	tm3_neutr.perc	tm3_compet.perc
1	81-85	M	no pre-vax covid	0	no	2	not detected	not detected	not detected	not detected	0.1	not detected	<900	<7	not detected	detected	204.5056492	detected	3836.68	>=900	900-5679	99.89180316	96.25927234
2	76-80	M	no pre-vax covid	0	no	2	not detected	not detected	NA	NA	NA	NA	NA	NA	detected	detected	167.9778625	detected	5680	>=900	>=5680	99.9868379	97.75633293
3	71-75	M	no pre-vax covid	0	no	2	not detected	not detected	not detected	NA	NA	not detected	<900	<7	not detected	detected	179.2131048	detected	953.51	>=900	900-5679	99.05090449	95.54883721
4	76-80	M	no pre-vax covid	0	no	2	not detected	not detected	not detected	not detected	0.1	not detected	<900	<7	not detected	detected	169.5165163	detected	1767.31	>=900	900-5679	99.98968737	94.08372093
5	81-85	M	no pre-vax covid	0	no	2	not detected	not detected	NA	NA	NA	NA	NA	NA	NA	NA	NA	NA	NA	NA	NA	NA	NA
6	96-100	M	no pre-vax covid	0	no	2	not detected	not detected	not detected	not detected	0.1	not detected	<900	<7	detected	detected	170.3349392	detected	5680	>=900	>=5680	99.95064723	99.02325581
7	91-95	F	pre-vax symptomatic covid	1	yes	2	detected	detected	NA	NA	NA	NA	NA	NA	detected	detected	184.03346	detected	4595.88	>=900	900-5679	99.98228754	99.16976744
8	81-85	M	no pre-vax covid	0	no	2	not detected	not detected	not detected	not detected	0.1	not detected	<900	<7	not detected	detected	175.8141547	detected	3488.24	>=900	900-5679	99.89920296	93.19069767
9	76-80	M	pre-vax seropositivity	1	yes	2	NA	NA	detected	detected	4.090623039	detected	<900	7-899	not detected	detected	166.235424	detected	2439.3	>=900	900-5679	99.981765	97.7255814
10	81-85	M	no pre-vax covid	0	no	2	not detected	not detected	NA	NA	NA	NA	NA	NA	not detected	detected	190.4220583	detected	1311.51	>=900	900-5679	99.83387154	99.74567291
11	81-85	M	pre-vax symptomatic covid	1	yes	2	detected	detected	detected	detected	11.77277023	detected	<900	7-899	NA	NA	NA	NA	NA	NA	NA	NA	NA
12	86-90	M	no pre-vax covid	0	no	2	not detected	not detected	not detected	not detected	0.87429387	not detected	<900	<7	not detected	detected	202.1628425	detected	729.41	<900	7-899	99.58837872	89.36594843
13	66-70	M	pre-vax symptomatic covid	1	yes	2	detected	detected	detected	detected	63.51504374	detected	<900	7-899	not detected	detected	164.5358566	detected	1251.67	>=900	900-5679	99.8660991	97.44651163
14	76-80	M	pre-vax seropositivity	1	yes	2	not detected	not detected	not detected	not detected	0.1	detected	<900	7-899	NA	NA	NA	NA	NA	NA	NA	NA	NA
15	91-95	M	pre-vax seropositivity	1	yes	2	not detected	not detected	detected	NA	NA	detected	<900	7-899	detected	detected	198.631535	detected	3481.54	>=900	900-5679	99.92132074	96.87389615
16	71-75	M	no pre-vax covid	0	no	2	not detected	not detected	not detected	NA	NA	NA	NA	NA	not detected	detected	144.2431329	detected	896.5	<900	7-899	94.30774643	86.24186047
17	76-80	M	no pre-vax covid	0	no	2	not detected	not detected	not detected	not detected	0.1	not detected	<900	<7	not detected	detected	188.5859312	detected	596	<900	7-899	95.58343454	91.7744186
18	96-100	M	pre-vax symptomatic covid	1	yes	2	detected	detected	not detected	detected	26.89491116	detected	<900	7-899	not detected	detected	193.6560396	detected	1293.11	>=900	900-5679	99.90299593	97.66976744
19	91-95	M	no pre-vax covid	0	no	2	not detected	not detected	not detected	not detected	0.1	not detected	<900	<7	not detected	detected	184.8552057	detected	811.19	<900	7-899	98.73909256	84.06272618
20	86-90	M	no pre-vax covid	0	no	2	not detected	not detected	not detected	not detected	0.1	not detected	<900	<7	not detected	detected	66.07284225	detected	79.42	<900	7-899	85.58257955	29.72979493
21	96-100	M	pre-vax seropositivity	1	yes	2	not detected	not detected	not detected	not detected	0.1	detected	<900	7-899	not detected	detected	17.69406365	detected	160.79	<900	7-899	90.9529149	72.7
22	91-95	M	no pre-vax covid	0	no	2	not detected	not detected	not detected	not detected	0.1	not detected	<900	<7	not detected	detected	29.74370738	detected	47.73	<900	7-899	80.8335539	32.59767442
23	76-80	M	pre-vax seropositivity	1	yes	2	detected	detected	not detected	detected	1.868392284	detected	<900	7-899	not detected	detected	185.8667737	detected	2189.37	>=900	900-5679	99.89585486	95.22077005
24	91-95	M	pre-vax seropositivity	1	yes	2	not detected	not detected	detected	NA	NA	detected	>=900	900-5679	detected	detected	160.2371264	detected	5680	>=900	>=5680	99.9570406	99.24651163
25	81-85	M	pre-vax seropositivity	1	yes	2	detected	detected	detected	detected	44.89200573	detected	<900	7-899	NA	NA	NA	NA	NA	NA	NA	NA	NA
26	71-75	M	no pre-vax covid	0	no	1	not detected	not detected	NA	NA	NA	NA	NA	NA	not detected	detected	173.0364595	detected	315.59	<900	7-899	95.3577386	42.1278649
27	66-70	M	no pre-vax covid	0	no	2	not detected	not detected	not detected	not detected	0.1	not detected	<900	<7	not detected	detected	189.9353146	detected	1504.51	>=900	900-5679	99.98738571	98.3744186
28	76-80	M	pre-vax symptomatic covid	1	yes	2	detected	detected	detected	detected	77.49943457	detected	>=900	900-5679	not detected	detected	180.9199918	detected	5680	>=900	>=5680	99.98626381	99.2744186
29	66-70	M	pre-vax seropositivity	1	yes	2	detected	not detected	not detected	not detected	0.732777296	not detected	<900	<7	not detected	detected	172.8646374	detected	1140.02	>=900	900-5679	99.97909602	92.7372093
30	96-100	M	pre-vax seropositivity	1	yes	2	not detected	detected	not detected	detected	3.679136662	detected	<900	7-899	not detected	detected	166.4088514	detected	1048.03	>=900	900-5679	98.41890224	88.61395349
31	76-80	M	no pre-vax covid	0	no	2	not detected	not detected	not detected	NA	NA	not detected	<900	<7	NA	NA	NA	NA	NA	NA	NA	NA	NA
32	81-85	M	no pre-vax covid	0	no	2	not detected	not detected	not detected	NA	NA	not detected	<900	<7	NA	NA	NA	NA	NA	NA	NA	NA	NA
33	86-90	M	no pre-vax covid	0	no	2	not detected	not detected	not detected	not detected	0.1	not detected	<900	<7	NA	NA	NA	NA	NA	NA	NA	NA	NA
34	76-80	M	no pre-vax covid	0	no	2	not detected	not detected	not detected	not detected	0.1	not detected	<900	<7	detected	detected	179.0942276	detected	5680	>=900	>=5680	99.955299	99.21162791
35	86-90	M	no pre-vax covid	0	no	2	not detected	not detected	not detected	not detected	0.1	not detected	<900	<7	not detected	detected	40.75918842	detected	50.38	<900	7-899	90.23015325	70.45037089
36	81-85	M	pre-vax symptomatic covid	1	yes	2	detected	detected	NA	NA	NA	NA	NA	NA	not detected	detected	203.4391809	detected	5680	>=900	>=5680	99.87849733	99.82515012
37	81-85	M	pre-vax symptomatic covid	1	yes	2	detected	detected	detected	NA	NA	NA	NA	NA	detected	detected	176.9175522	detected	5680	>=900	>=5680	99.97545816	97.87937274
38	81-85	M	pre-vax seropositivity	1	yes	2	detected	not detected	detected	not detected	0.1	detected	<900	7-899	detected	detected	159.3689955	detected	819.66	<900	7-899	97.95590771	92.65379976
39	76-80	M	no pre-vax covid	0	no	2	not detected	not detected	not detected	not detected	0.1	not detected	<900	<7	NA	NA	NA	NA	NA	NA	NA	NA	NA
40	76-80	M	pre-vax symptomatic covid	1	yes	2	detected	detected	detected	detected	75.4852698	detected	<900	7-899	not detected	detected	147.185125	detected	5680	>=900	>=5680	99.98477852	98.6827503
41	81-85	M	pre-vax seropositivity	1	yes	2	detected	detected	detected	detected	72.62490432	detected	>=900	900-5679	detected	detected	188.2210911	detected	5680	>=900	>=5680	99.98922824	99.40657012
42	81-85	M	pre-vax seropositivity	1	yes	2	not detected	not detected	not detected	not detected	0.1	detected	<900	7-899	NA	NA	NA	NA	NA	NA	NA	NA	NA
43	81-85	M	no pre-vax covid	0	no	2	not detected	not detected	not detected	not detected	0.1	not detected	<900	<7	NA	NA	NA	NA	NA	NA	NA	NA	NA
44	76-80	F	pre-vax seropositivity	1	yes	2	detected	detected	detected	detected	69.94013055	detected	<900	7-899	not detected	detected	190.2957458	detected	5244.08	>=900	900-5679	99.96807072	96.67068758
45	86-90	F	pre-vax seropositivity	1	yes	2	not detected	not detected	detected	detected	52.73459537	detected	<900	7-899	detected	detected	189.7733433	detected	5680	>=900	>=5680	99.97978886	98.49302326
46	81-85	M	pre-vax symptomatic covid	1	yes	2	detected	detected	detected	detected	68.87571214	detected	<900	7-899	detected	detected	190.937713	detected	5680	>=900	>=5680	99.95486359	99.19992935
47	71-75	M	pre-vax seropositivity	1	yes	2	detected	detected	detected	detected	73.55792609	NA	NA	NA	not detected	detected	201.6545521	detected	5680	>=900	>=5680	99.97297709	99.05687036
48	66-70	M	pre-vax seropositivity	1	yes	2	detected	detected	not detected	detected	7.897353493	detected	<900	7-899	not detected	detected	190.638789	detected	5680	>=900	>=5680	99.97091812	98.3744186
49	86-90	M	no pre-vax covid	0	no	2	not detected	not detected	not detected	NA	NA	NA	NA	NA	not detected	detected	187.8760434	detected	760.63	<900	7-899	99.27238243	73.32207479
50	71-75	M	pre-vax seropositivity	1	yes	2	detected	detected	detected	detected	13.47847357	detected	<900	7-899	not detected	detected	147.3979786	detected	3268.14	>=900	900-5679	99.85370087	99.09925821
51	71-75	M	no pre-vax covid	0	no	2	not detected	not detected	not detected	NA	NA	NA	NA	NA	not detected	detected	125.9935969	detected	570.39	<900	7-899	90.09752347	89.49819059
52	91-95	M	pre-vax seropositivity	1	yes	2	detected	detected	detected	detected	3.370737315	detected	<900	7-899	NA	NA	NA	NA	NA	NA	NA	NA	NA
53	81-85	M	no pre-vax covid	0	no	2	not detected	not detected	not detected	not detected	0.1	not detected	<900	<7	not detected	detected	3.369194445	detected	31.03	<900	7-899	91.44615178	40.69939951
54	86-90	M	pre-vax seropositivity	1	yes	2	not detected	not detected	not detected	not detected	0.1	detected	<900	7-899	not detected	detected	134.145677	detected	1125.11	>=900	900-5679	98.02827751	93.78372093
55	76-80	M	pre-vax symptomatic covid	NA	NA	2	NA	NA	NA	NA	NA	NA	NA	NA	not detected	detected	105.2953342	detected	3693.67	>=900	900-5679	99.97992535	94.20989144
56	86-90	M	pre-vax seropositivity	1	yes	2	detected	detected	NA	NA	NA	NA	NA	NA	NA	NA	NA	NA	NA	NA	NA	NA	NA
57	76-80	M	pre-vax seropositivity	1	yes	2	detected	detected	detected	detected	82.05809683	detected	<900	7-899	detected	detected	145.3962665	detected	5680	>=900	>=5680	99.98144429	99.4627907
58	81-85	M	pre-vax seropositivity	1	yes	2	detected	detected	not detected	not detected	0.1	not detected	<900	<7	not detected	detected	187.4313385	detected	3427.91	>=900	900-5679	99.97881177	97.039807
59	76-80	M	pre-vax seropositivity	1	yes	1	detected	detected	NA	NA	NA	NA	NA	NA	not detected	detected	173.463453	detected	1136.03	>=900	900-5679	99.98915407	97.4668275
60	76-80	M	pre-vax seropositivity	1	yes	2	not detected	detected	not detected	detected	4.082467603	detected	<900	7-899	NA	NA	NA	NA	NA	NA	NA	NA	NA
61	86-90	M	no pre-vax covid	0	no	2	not detected	not detected	not detected	not detected	0.1	not detected	<900	<7	not detected	detected	17.75436497	detected	344.33	<900	7-899	94.15539185	80.0255814
62	76-80	M	no pre-vax covid	0	no	2	not detected	not detected	NA	NA	NA	NA	NA	NA	NA	NA	NA	NA	NA	NA	NA	NA	NA
63	76-80	M	no pre-vax covid	0	no	2	not detected	not detected	not detected	not detected	0.1	not detected	<900	<7	NA	NA	NA	NA	NA	NA	NA	NA	NA
64	66-70	M	no pre-vax covid	0	no	2	not detected	not detected	not detected	NA	NA	not detected	<900	<7	not detected	detected	162.7120128	detected	699.2	<900	7-899	93.84225908	88.85116279
65	96-100	F	no pre-vax covid	0	no	1	not detected	not detected	not detected	not detected	0.1	not detected	<900	<7	detected	detected	168.7439117	detected	3716.31	>=900	900-5679	99.96756818	99.30232558
66	86-90	M	pre-vax seropositivity	1	yes	2	detected	detected	not detected	detected	3.886193003	not detected	<900	<7	not detected	detected	138.9025761	detected	418.05	<900	7-899	99.95939389	38.42943305
67	91-95	M	pre-vax symptomatic covid	1	yes	2	detected	detected	detected	detected	93.24627989	detected	<900	7-899	not detected	detected	26.15099519	detected	5680	>=900	>=5680	98	29.84883721
68	76-80	M	no pre-vax covid	0	no	2	not detected	not detected	not detected	not detected	0.1	not detected	<900	<7	not detected	detected	155.0392764	detected	2184.64	>=900	900-5679	99.98076834	98.17202402
69	76-80	M	pre-vax seropositivity	1	yes	2	detected	detected	detected	detected	22.60765931	detected	<900	7-899	detected	detected	178.2473945	detected	2122.44	>=900	900-5679	99.95448106	94.31121834
70	76-80	M	pre-vax seropositivity	1	yes	2	detected	detected	not detected	detected	16.03596127	detected	<900	7-899	not detected	detected	191.1782004	detected	5250.59	>=900	900-5679	99.9773256	97.85813953
71	86-90	M	no pre-vax covid	0	no	2	not detected	not detected	not detected	NA	NA	NA	NA	NA	NA	NA	NA	NA	NA	NA	NA	NA	NA
72	71-75	M	pre-vax seropositivity	1	yes	2	detected	detected	detected	detected	78.48743415	detected	<900	7-899	NA	NA	NA	NA	NA	NA	NA	NA	NA
73	81-85	M	no pre-vax covid	0	no	2	not detected	not detected	not detected	not detected	0.1	not detected	<900	<7	not detected	detected	177.546459	detected	205.18	<900	7-899	96.63293097	67.52325581
74	86-90	M	pre-vax seropositivity	1	yes	2	detected	detected	NA	NA	NA	NA	NA	NA	detected	detected	19.90794944	detected	126.69	<900	7-899	98.32512225	24.87334138
75	86-90	M	pre-vax seropositivity	1	yes	2	detected	detected	detected	detected	70.36736903	detected	>=900	>=5680	detected	detected	139.092418	detected	5680	>=900	>=5680	99.92165056	99.17674419
76	76-80	M	pre-vax seropositivity	1	yes	2	detected	not detected	not detected	not detected	0.1	detected	<900	7-899	not detected	detected	124.8462299	detected	5680	>=900	>=5680	99.98801505	99.06216884
77	66-70	M	pre-vax seropositivity	1	yes	2	not detected	detected	not detected	detected	5.091749468	detected	<900	7-899	not detected	detected	167.9301	detected	2712.09	>=900	900-5679	99.95491543	97.98069964
78	81-85	M	pre-vax seropositivity	1	yes	2	detected	detected	detected	detected	6.101204878	detected	<900	7-899	detected	detected	190.7291663	detected	4997.85	>=900	900-5679	99.98213541	99.34418605
79	71-75	M	pre-vax seropositivity	1	yes	2	detected	detected	detected	NA	NA	detected	<900	7-899	detected	detected	184.0286111	detected	5680	>=900	>=5680	99.94194676	99.18372093
80	81-85	M	no pre-vax covid	0	no	2	not detected	not detected	NA	NA	NA	NA	NA	NA	NA	NA	NA	NA	NA	NA	NA	NA	NA
81	76-80	M	pre-vax seropositivity	1	yes	2	detected	detected	detected	detected	6.973742325	detected	<900	7-899	not detected	detected	190.9007418	detected	4932.84	>=900	900-5679	99.91817167	91.87937274
82	71-75	M	pre-vax symptomatic covid	1	yes	2	NA	NA	detected	detected	87.83448069	detected	<900	7-899	not detected	detected	190.4040085	detected	5680	>=900	>=5680	99.96168486	98.97949337
83	81-85	M	no pre-vax covid	0	no	2	not detected	not detected	not detected	NA	NA	not detected	<900	<7	not detected	detected	205.5379023	detected	431.32	<900	7-899	97.75989365	90.17674419
84	86-90	F	pre-vax seropositivity	1	yes	2	detected	detected	detected	detected	72.51066592	detected	<900	7-899	detected	detected	189.7373685	detected	4281.57	>=900	900-5679	99.98542344	98.99396864
85	91-95	M	no pre-vax covid	0	no	2	not detected	not detected	not detected	not detected	0.340667167	not detected	<900	<7	not detected	detected	141.3187183	detected	81.65	<900	7-899	91.68615649	9.925821265
86	76-80	M	pre-vax seropositivity	1	yes	2	detected	detected	not detected	not detected	0.300262304	not detected	<900	<7	NA	NA	NA	NA	NA	NA	NA	NA	NA
87	71-75	M	no pre-vax covid	0	no	2	not detected	not detected	not detected	not detected	0.1	not detected	<900	<7	not detected	detected	180.0645258	detected	5680	>=900	>=5680	99.98314166	96.3372093
88	81-85	M	no pre-vax covid	0	no	2	not detected	not detected	NA	NA	NA	NA	NA	NA	detected	detected	180.4233277	detected	5680	>=900	>=5680	99.96302446	97.88604651
89	81-85	M	no pre-vax covid	0	no	2	not detected	not detected	NA	NA	NA	NA	NA	NA	NA	NA	NA	NA	NA	NA	NA	NA	NA
90	81-85	M	pre-vax seropositivity	1	yes	2	not detected	detected	not detected	detected	2.255711354	not detected	<900	<7	not detected	detected	195.2753223	detected	2111.22	>=900	900-5679	99.99052693	97.36665489
91	76-80	M	no pre-vax covid	0	no	2	not detected	not detected	not detected	NA	NA	not detected	<900	<7	not detected	detected	146.0342445	detected	1104.47	>=900	900-5679	99.18697661	96.81031438
92	81-85	M	pre-vax symptomatic covid	1	yes	2	detected	detected	detected	detected	71.19428936	detected	<900	7-899	detected	detected	177.3541229	detected	5680	>=900	>=5680	99.96574859	98.74065139
93	91-95	M	pre-vax seropositivity	1	yes	2	detected	detected	detected	detected	10.26760678	detected	<900	7-899	NA	NA	NA	NA	NA	NA	NA	NA	NA
94	86-90	M	no pre-vax covid	0	no	2	not detected	not detected	not detected	not detected	0.1	NA	NA	NA	NA	NA	NA	NA	NA	NA	NA	NA	NA
95	66-70	M	no pre-vax covid	0	no	2	not detected	not detected	not detected	not detected	0.1	not detected	<900	<7	not detected	detected	203.6362545	detected	2222.33	>=900	900-5679	99.9197851	96.86859767
96	76-80	M	pre-vax symptomatic covid	1	yes	2	detected	detected	not detected	detected	25.36757638	detected	<900	7-899	not detected	detected	176.114397	detected	1751.95	>=900	900-5679	99.98397444	94.36911942
97	71-75	M	pre-vax symptomatic covid	1	yes	2	detected	detected	detected	detected	61.55680269	detected	<900	7-899	detected	detected	153.9784231	detected	5680	>=900	>=5680	99.98903514	99.10253317
98	76-80	M	pre-vax seropositivity	1	yes	2	detected	detected	detected	detected	65.80992672	NA	NA	NA	not detected	detected	206.5669614	detected	5680	>=900	>=5680	99.97503711	99.05116279
99	81-85	M	pre-vax seropositivity	1	yes	2	detected	detected	detected	not detected	0.300262304	detected	<900	7-899	detected	detected	162.7891507	detected	540.83	<900	7-899	99.97367852	75.97209302
100	81-85	M	pre-vax seropositivity	1	yes	2	detected	detected	not detected	detected	6.601455296	detected	<900	7-899	not detected	detected	148.1088487	detected	3199.1	>=900	900-5679	99.96662812	95.39686369
101	71-75	M	pre-vax symptomatic covid	1	yes	2	not detected	detected	not detected	not detected	0.1	detected	<900	7-899	NA	NA	NA	NA	NA	NA	NA	NA	NA
102	76-80	M	no pre-vax covid	0	no	2	not detected	not detected	NA	NA	NA	NA	NA	NA	NA	NA	NA	NA	NA	NA	NA	NA	NA
103	71-75	M	pre-vax seropositivity	1	yes	2	detected	detected	not detected	detected	47.31172094	detected	<900	7-899	not detected	detected	198.7662069	detected	5680	>=900	>=5680	99.89926501	98.81395349
104	91-95	M	pre-vax seropositivity	1	yes	2	detected	detected	not detected	detected	4.805690759	detected	<900	7-899	NA	NA	NA	NA	NA	NA	NA	NA	NA
105	91-95	M	pre-vax seropositivity	1	yes	2	not detected	not detected	detected	detected	91.043091	detected	<900	7-899	detected	detected	190.0073462	detected	4586.76	>=900	900-5679	99.96239789	99.06634499
106	96-100	M	pre-vax seropositivity	1	yes	2	detected	detected	not detected	not detected	1.036394685	detected	<900	7-899	not detected	detected	191.2522574	detected	1741.82	>=900	900-5679	99.97175616	98.25581395
107	81-85	M	no pre-vax covid	0	no	2	not detected	not detected	not detected	not detected	0.1	not detected	<900	<7	not detected	detected	139.767426	detected	1015.28	>=900	900-5679	99.96368649	92.50697674
108	86-90	M	no pre-vax covid	0	no	2	not detected	not detected	not detected	not detected	0.1	not detected	<900	<7	NA	NA	NA	NA	NA	NA	NA	NA	NA
109	76-80	M	pre-vax symptomatic covid	1	yes	2	detected	detected	NA	NA	NA	NA	NA	NA	detected	detected	177.3541229	detected	5680	>=900	>=5680	99.98172697	99.24651163
110	86-90	M	no pre-vax covid	0	no	1	not detected	not detected	not detected	not detected	0.1	not detected	<900	<7	detected	detected	140.771579	detected	5680	>=900	>=5680	99.91413585	98.79131484
111	71-75	M	no pre-vax covid	0	no	2	not detected	not detected	not detected	not detected	0.1	not detected	<900	<7	not detected	detected	173.2991002	detected	1514.27	>=900	900-5679	100	91.3
112	81-85	M	no pre-vax covid	0	no	2	not detected	not detected	not detected	not detected	0.1	not detected	<900	<7	NA	NA	NA	NA	NA	NA	NA	NA	NA
113	81-85	M	pre-vax symptomatic covid	1	yes	2	detected	not detected	NA	NA	NA	NA	NA	NA	NA	NA	NA	NA	NA	NA	NA	NA	NA
114	86-90	M	pre-vax seropositivity	1	yes	2	detected	detected	detected	detected	69.80029164	detected	>=900	900-5679	detected	detected	140.963406	detected	5498.04	>=900	900-5679	99.98383425	99.61321088
115	71-75	M	pre-vax seropositivity	1	yes	2	detected	detected	not detected	detected	3.679136662	detected	<900	7-899	not detected	detected	147.7582732	detected	5454.24	>=900	900-5679	99.98313605	97.82325581
116	96-100	F	no pre-vax covid	0	no	2	not detected	not detected	not detected	not detected	0.1	not detected	<900	<7	not detected	not detected	0.1	not detected	7	<900	<7	67.07045922	0
117	81-85	M	pre-vax symptomatic covid	1	yes	2	detected	detected	detected	NA	NA	NA	NA	NA	detected	detected	156.791656	detected	5680	>=900	>=5680	99.98704306	96.85348837
118	96-100	M	no pre-vax covid	0	no	2	not detected	not detected	not detected	not detected	0.493086854	not detected	<900	<7	NA	NA	NA	NA	NA	NA	NA	NA	NA
119	71-75	M	no pre-vax covid	0	no	2	not detected	not detected	not detected	not detected	0.1	not detected	<900	<7	NA	NA	NA	NA	NA	NA	NA	NA	NA
120	71-75	M	no pre-vax covid	0	no	2	not detected	not detected	not detected	not detected	0.1	not detected	<900	<7	not detected	detected	157.2530776	detected	907.36	>=900	900-5679	99.96662812	95.32448733
121	86-90	M	pre-vax seropositivity	1	yes	2	detected	detected	not detected	NA	NA	not detected	<900	<7	NA	NA	NA	NA	NA	NA	NA	NA	NA
122	76-80	M	pre-vax seropositivity	1	yes	2	detected	detected	not detected	detected	77.49943457	detected	<900	7-899	not detected	detected	204.9020547	detected	5680	>=900	>=5680	99.96368649	99.53373366
123	76-80	M	pre-vax seropositivity	1	yes	2	detected	detected	detected	detected	24.04990177	detected	<900	7-899	NA	NA	NA	NA	NA	NA	NA	NA	NA
124	91-95	M	no pre-vax covid	0	no	2	not detected	not detected	not detected	not detected	0.479171231	not detected	<900	<7	not detected	detected	178.3657097	detected	305.95	<900	7-899	98.52347116	88.01447527
125	76-80	M	pre-vax seropositivity	1	yes	2	not detected	not detected	not detected	not detected	0.1	detected	<900	7-899	not detected	detected	165.3023266	detected	5680	>=900	>=5680	99.96368649	94.51077358
126	91-95	M	pre-vax seropositivity	1	yes	2	not detected	not detected	not detected	detected	48.80368017	detected	<900	7-899	detected	NA	NA	detected	2718.12	>=900	900-5679	NA	NA
127	71-75	M	pre-vax symptomatic covid	1	yes	2	detected	detected	detected	detected	77.78716129	detected	<900	7-899	detected	detected	192.8887895	detected	5680	>=900	>=5680	99.93140782	97.92093023
128	86-90	M	no pre-vax covid	0	no	2	not detected	not detected	not detected	not detected	0.1	not detected	<900	<7	not detected	detected	205.6772568	detected	538.66	<900	7-899	98.69948346	84.37394451
129	86-90	M	no pre-vax covid	0	no	1	not detected	not detected	not detected	not detected	0.1	not detected	<900	<7	detected	detected	154.2559976	detected	5409.17	>=900	900-5679	99.89553408	96.50465116
130	76-80	M	no pre-vax covid	0	no	2	not detected	not detected	not detected	not detected	0.1	not detected	<900	<7	not detected	detected	129.7512087	detected	889.63	<900	7-899	98.01913876	84.94418605
131	76-80	M	pre-vax seropositivity	1	yes	2	detected	detected	NA	NA	NA	NA	NA	NA	NA	NA	NA	NA	NA	NA	NA	NA	NA
132	81-85	M	pre-vax symptomatic covid	1	yes	2	detected	detected	not detected	detected	66.60411789	detected	>=900	900-5679	NA	NA	NA	NA	NA	NA	NA	NA	NA
133	86-90	M	pre-vax seropositivity	1	yes	2	detected	detected	detected	detected	38.32284479	detected	<900	7-899	NA	NA	NA	NA	NA	NA	NA	NA	NA
134	76-80	M	pre-vax seropositivity	1	yes	2	detected	detected	not detected	detected	28.83600241	detected	<900	7-899	not detected	detected	202.4958788	detected	4460.62	>=900	900-5679	99.89546973	98.93953488
135	86-90	M	pre-vax seropositivity	1	yes	2	detected	detected	not detected	detected	8.999327599	detected	<900	7-899	not detected	detected	171.6478406	detected	5680	>=900	>=5680	99.98919816	99.19069767
136	91-95	M	pre-vax seropositivity	1	yes	2	not detected	not detected	not detected	detected	20.5051193	detected	<900	7-899	NA	NA	NA	NA	NA	NA	NA	NA	NA
137	96-100	M	no pre-vax covid	0	no	2	not detected	not detected	not detected	not detected	0.1	not detected	<900	<7	not detected	detected	169.3032777	detected	1085.19	>=900	900-5679	96.31190844	98.64358884
138	71-75	M	pre-vax seropositivity	1	yes	2	not detected	detected	not detected	not detected	0.150389972	detected	<900	7-899	NA	NA	NA	NA	NA	NA	NA	NA	NA
139	81-85	M	pre-vax symptomatic covid	1	yes	2	detected	detected	detected	detected	71.30828841	detected	<900	7-899	detected	detected	176.2647104	detected	5680	>=900	>=5680	99.98920255	98.55247286
140	71-75	M	pre-vax seropositivity	1	yes	2	detected	detected	not detected	not detected	0.1	not detected	<900	<7	not detected	NA	NA	detected	5680	>=900	>=5680	NA	NA
141	76-80	M	no pre-vax covid	0	no	1	not detected	not detected	NA	NA	NA	NA	NA	NA	not detected	not detected	0.1	not detected	7	<900	<7	70.97317307	4.669767442
142	76-80	M	no pre-vax covid	0	no	2	not detected	not detected	not detected	not detected	0.1	not detected	<900	<7	NA	NA	NA	NA	NA	NA	NA	NA	NA
143	71-75	M	no pre-vax covid	0	no	2	not detected	not detected	not detected	not detected	0.1	not detected	<900	<7	not detected	detected	133.1020427	detected	359.91	<900	7-899	96.08758143	90.48392794
144	86-90	F	no pre-vax covid	0	no	2	not detected	not detected	NA	NA	NA	NA	NA	NA	NA	NA	NA	NA	NA	NA	NA	NA	NA
145	91-95	M	no pre-vax covid	0	no	2	not detected	not detected	not detected	not detected	0.1	not detected	<900	<7	not detected	detected	192.1803942	detected	1472.75	>=900	900-5679	99.89739954	91.58601201
146	91-95	M	pre-vax seropositivity	1	yes	2	detected	detected	detected	detected	77.49943457	detected	>=900	900-5679	NA	NA	NA	NA	NA	NA	NA	NA	NA
147	86-90	F	pre-vax seropositivity	1	yes	2	detected	detected	not detected	detected	26.89491116	detected	<900	7-899	not detected	NA	NA	detected	2756.34	>=900	900-5679	NA	NA
148	76-80	M	no pre-vax covid	0	no	2	not detected	not detected	not detected	not detected	0.1	not detected	<900	<7	not detected	detected	139.9599365	detected	159.14	<900	7-899	84.37406376	55.14837153
149	71-75	M	pre-vax seropositivity	1	yes	2	detected	detected	NA	NA	NA	NA	NA	NA	NA	NA	NA	NA	NA	NA	NA	NA	NA
150	71-75	M	no pre-vax covid	0	no	2	not detected	not detected	not detected	not detected	0.1	not detected	<900	<7	NA	NA	NA	NA	NA	NA	NA	NA	NA
151	81-85	M	pre-vax seropositivity	1	yes	2	detected	detected	not detected	detected	9.734081723	detected	<900	7-899	not detected	detected	237.2373484	detected	4148.85	>=900	900-5679	99.97039285	98.59767442
152	81-85	M	pre-vax symptomatic covid	1	yes	2	detected	detected	detected	detected	11.58572541	detected	<900	7-899	NA	NA	NA	NA	NA	NA	NA	NA	NA
153	76-80	M	no pre-vax covid	0	no	2	not detected	not detected	not detected	not detected	0.1	not detected	<900	<7	not detected	detected	205.3389883	detected	658.62	<900	7-899	98.07453976	95.76121512
154	71-75	M	no pre-vax covid	0	no	2	not detected	not detected	not detected	not detected	0.1	not detected	<900	<7	not detected	detected	63.77841473	detected	167	<900	7-899	85.12940842	50.81302774
155	86-90	M	pre-vax seropositivity	1	yes	2	detected	detected	detected	detected	66.60411789	detected	<900	7-899	detected	detected	188.714947	detected	5304.43	>=900	900-5679	99.95440744	98.00241255
156	76-80	M	pre-vax seropositivity	1	yes	2	detected	detected	detected	detected	17.6817665	detected	<900	7-899	NA	NA	NA	NA	NA	NA	NA	NA	NA
157	86-90	M	no pre-vax covid	0	no	2	not detected	not detected	not detected	not detected	0.1	not detected	<900	<7	NA	detected	NA	NA	NA	NA	NA	NA	NA
158	76-80	M	no pre-vax covid	0	no	2	not detected	not detected	not detected	not detected	0.1	not detected	<900	<7	not detected	detected	180.8254286	detected	910.57	>=900	900-5679	95.18150289	95.1372093
159	81-85	M	pre-vax seropositivity	1	yes	2	detected	detected	detected	detected	69.98438525	detected	>=900	900-5679	not detected	detected	196.6604497	detected	5173.7	>=900	900-5679	99.95763424	99.45581395
160	81-85	M	no pre-vax covid	0	no	2	not detected	not detected	not detected	not detected	0.1	not detected	<900	<7	not detected	detected	172.3162483	detected	1800.53	>=900	900-5679	99.98213541	92.42943305
161	71-75	F	pre-vax symptomatic covid	1	yes	2	detected	detected	not detected	detected	54.26464076	detected	<900	7-899	NA	NA	NA	NA	NA	NA	NA	NA	NA
162	71-75	M	pre-vax seropositivity	1	yes	2	detected	detected	not detected	detected	81.8156124	detected	<900	7-899	not detected	detected	203.419484	detected	5680	>=900	>=5680	99.98920255	98.7372093
163	91-95	M	no pre-vax covid	0	no	2	not detected	not detected	not detected	not detected	0.1	not detected	<900	<7	not detected	detected	178.8736647	detected	107.1	<900	7-899	87.42397323	43.82147165
164	81-85	M	no pre-vax covid	0	no	2	not detected	not detected	not detected	not detected	0.1	not detected	<900	<7	NA	NA	NA	NA	NA	NA	NA	NA	NA
165	86-90	M	pre-vax seropositivity	1	yes	2	detected	detected	detected	detected	41.65274232	detected	<900	7-899	detected	detected	147.5623136	detected	5680	>=900	>=5680	99.98096212	99.23255814
166	81-85	M	pre-vax seropositivity	1	yes	2	detected	detected	not detected	detected	6.226803837	detected	<900	7-899	not detected	detected	204.4858491	detected	1946.29	>=900	900-5679	99.98523315	97.8700106
167	91-95	M	no pre-vax covid	0	no	2	not detected	not detected	NA	NA	NA	NA	NA	NA	NA	NA	NA	NA	NA	NA	NA	NA	NA
168	71-75	M	no pre-vax covid	0	no	2	not detected	not detected	not detected	not detected	0.1	not detected	<900	<7	not detected	detected	186.8636519	detected	2026.36	>=900	900-5679	99.98213541	97.69843185
169	81-85	M	no pre-vax covid	0	no	2	not detected	not detected	not detected	not detected	0.1	not detected	<900	<7	not detected	detected	162.9744308	detected	268.2	<900	7-899	90.84922039	30.15581395
170	76-80	M	pre-vax symptomatic covid	1	yes	2	detected	detected	detected	NA	NA	NA	NA	NA	detected	detected	208.9779748	detected	5680	>=900	>=5680	99.98221898	99.44186047
171	91-95	M	pre-vax symptomatic covid	0	no	2	not detected	not detected	not detected	not detected	0.1	not detected	<900	<7	detected	detected	168.2966261	detected	3139.02	>=900	900-5679	99.94775208	89.013269
172	71-75	M	pre-vax seropositivity	1	yes	2	not detected	detected	not detected	detected	8.564337484	not detected	<900	<7	not detected	detected	117.891288	detected	318.86	<900	7-899	98.92669815	52.34186047
173	76-80	M	pre-vax seropositivity	1	yes	2	detected	detected	not detected	detected	21.88186432	detected	<900	7-899	not detected	detected	142.9093641	detected	5490.98	>=900	900-5679	99.9216023	98.14023313
174	81-85	M	pre-vax seropositivity	1	yes	2	detected	detected	detected	detected	65.49689704	detected	<900	7-899	detected	detected	144.9916504	detected	5680	>=900	>=5680	99.98237348	99.33023256
175	66-70	M	pre-vax seropositivity	1	yes	2	NA	NA	detected	detected	79.84337454	detected	<900	7-899	detected	detected	189.9893357	detected	3724.04	>=900	900-5679	99.89739954	97.44651163
176	91-95	M	pre-vax seropositivity	1	yes	2	detected	detected	not detected	detected	16.23835966	detected	<900	7-899	NA	NA	NA	NA	NA	NA	NA	NA	NA
177	71-75	M	pre-vax seropositivity	1	yes	2	detected	detected	detected	detected	76.48109873	detected	<900	7-899	not detected	detected	178.2136046	detected	5680	>=900	>=5680	99.96749018	98.26296743
178	71-75	M	no pre-vax covid	0	no	2	not detected	not detected	not detected	not detected	0.1	not detected	<900	<7	not detected	detected	184.5750514	detected	156.96	<900	7-899	84.98067896	44.24125452
179	91-95	M	pre-vax symptomatic covid	1	yes	2	detected	detected	NA	NA	NA	NA	NA	NA	NA	NA	NA	NA	NA	NA	NA	NA	NA
180	71-75	M	pre-vax seropositivity	1	yes	2	detected	detected	NA	NA	NA	NA	NA	NA	NA	NA	NA	NA	NA	NA	NA	NA	NA
181	86-90	M	pre-vax seropositivity	1	yes	2	not detected	not detected	detected	detected	50.23930746	detected	>=900	900-5679	detected	detected	185.5610866	detected	5187.46	>=900	900-5679	99.88620677	99.50724126
182	86-90	M	pre-vax symptomatic covid	1	yes	2	detected	detected	detected	detected	12.33661723	detected	<900	7-899	not detected	detected	173.8381418	detected	5680	>=900	>=5680	99.98798784	98.66744186
183	81-85	M	pre-vax symptomatic covid	1	yes	2	detected	detected	not detected	detected	74.51113627	detected	<900	7-899	detected	detected	189.9173109	detected	5680	>=900	>=5680	99.98432056	99.30232558
184	86-90	M	pre-vax seropositivity	1	yes	2	detected	detected	not detected	detected	6.787860358	detected	<900	7-899	not detected	detected	203.7545904	detected	4968.27	>=900	900-5679	99.90114657	98.27020507
185	91-95	M	no pre-vax covid	0	no	2	not detected	not detected	not detected	not detected	0.921062023	not detected	<900	<7	not detected	detected	125.2457762	detected	368.14	<900	7-899	95.07279231	86.92864712
186	86-90	M	pre-vax seropositivity	1	yes	2	not detected	detected	not detected	detected	6.827658776	not detected	<900	<7	not detected	detected	179.5518311	detected	329.45	<900	7-899	94.63963311	74.79302326
187	86-90	M	pre-vax seropositivity	1	yes	2	detected	detected	not detected	detected	2.590208524	detected	<900	7-899	not detected	detected	157.8872901	detected	5296.67	>=900	900-5679	99.98294305	98.69534884
188	71-75	M	pre-vax symptomatic covid	1	yes	2	detected	detected	not detected	detected	43.61172871	detected	<900	7-899	NA	NA	NA	NA	NA	NA	NA	NA	NA
189	91-95	M	pre-vax symptomatic covid	1	yes	2	detected	detected	NA	NA	NA	NA	NA	NA	NA	NA	NA	NA	NA	NA	NA	NA	NA
190	81-85	M	no pre-vax covid	0	no	2	not detected	not detected	not detected	not detected	0.1	not detected	<900	<7	not detected	detected	193.150435	detected	954.11	>=900	900-5679	99.76983932	93.21860465
191	71-75	M	no pre-vax covid	0	no	2	not detected	not detected	not detected	not detected	0.1	not detected	<900	<7	not detected	detected	189.755355	detected	790.59	<900	7-899	99.98088905	95.88372093
192	91-95	M	no pre-vax covid	0	no	2	not detected	not detected	NA	NA	NA	NA	NA	NA	NA	NA	NA	NA	NA	NA	NA	NA	NA
193	81-85	M	no pre-vax covid	0	no	2	not detected	not detected	not detected	not detected	0.1	not detected	<900	<7	NA	NA	NA	NA	NA	NA	NA	NA	NA
194	71-75	M	no pre-vax covid	0	no	2	not detected	not detected	not detected	not detected	0.1	not detected	<900	<7	not detected	detected	132.3597113	detected	535.85	<900	7-899	92.3992628	65.75874548
195	71-75	M	pre-vax seropositivity	1	yes	2	detected	not detected	not detected	not detected	0.1	not detected	<900	<7	NA	NA	NA	NA	NA	NA	NA	NA	NA
196	81-85	M	pre-vax seropositivity	1	yes	2	detected	detected	not detected	not detected	1.036394685	detected	<900	7-899	NA	NA	NA	NA	NA	NA	NA	NA	NA
197	81-85	M	no pre-vax covid	0	no	2	not detected	not detected	not detected	not detected	0.1	not detected	<900	<7	not detected	detected	111.0438953	detected	124.29	<900	7-899	93.12398383	82.16531261
198	76-80	M	pre-vax symptomatic covid	1	yes	2	detected	detected	not detected	NA	NA	detected	<900	7-899	not detected	detected	185.2411124	detected	2731.54	>=900	900-5679	99.87120378	96.9427764
199	86-90	M	pre-vax symptomatic covid	1	yes	2	detected	detected	detected	detected	47.31172094	detected	<900	7-899	NA	NA	NA	NA	NA	NA	NA	NA	NA
200	71-75	M	pre-vax seropositivity	1	yes	2	detected	detected	not detected	detected	21.64881544	detected	<900	7-899	not detected	detected	189.0978958	detected	5680	>=900	>=5680	99.99219864	96.32325581
201	71-75	M	pre-vax symptomatic covid	1	yes	2	detected	detected	detected	detected	78.54113097	detected	<900	7-899	NA	NA	NA	NA	NA	NA	NA	NA	NA
202	81-85	F	pre-vax seropositivity	1	yes	2	detected	detected	NA	NA	NA	NA	NA	NA	NA	NA	NA	NA	NA	NA	NA	NA	NA
203	91-95	M	pre-vax symptomatic covid	1	yes	2	not detected	detected	NA	NA	NA	NA	NA	NA	NA	NA	NA	NA	NA	NA	NA	NA	NA
204	76-80	M	no pre-vax covid	0	no	2	not detected	not detected	not detected	NA	NA	NA	NA	NA	NA	NA	NA	NA	NA	NA	NA	NA	NA
205	71-75	M	no pre-vax covid	0	no	2	not detected	not detected	NA	NA	NA	NA	NA	NA	not detected	detected	165.3083024	detected	1012.37	>=900	900-5679	99.39056094	81.70697674
206	71-75	M	no pre-vax covid	0	no	2	not detected	not detected	not detected	not detected	0.1	not detected	<900	<7	not detected	detected	160.7039736	detected	2031.46	>=900	900-5679	99.98231642	96.62726176
207	71-75	M	pre-vax seropositivity	1	yes	2	not detected	detected	not detected	not detected	0.1	not detected	<900	<7	not detected	NA	NA	detected	1658.36	>=900	900-5679	NA	NA
208	86-90	M	pre-vax symptomatic covid	1	yes	2	detected	detected	detected	detected	7.897353493	detected	<900	7-899	NA	NA	NA	NA	NA	NA	NA	NA	NA
209	96-100	M	pre-vax symptomatic covid	1	yes	2	detected	NA	NA	NA	NA	NA	NA	NA	NA	NA	NA	NA	NA	NA	NA	NA	NA
210	81-85	M	pre-vax symptomatic covid	1	yes	2	NA	NA	detected	detected	28.72624457	detected	<900	7-899	NA	NA	NA	NA	NA	NA	NA	NA	NA
211	86-90	M	pre-vax seropositivity	1	yes	2	detected	detected	not detected	detected	75.4852698	detected	<900	7-899	not detected	detected	158.2699899	detected	4449.23	>=900	900-5679	99.98405369	98.89767442
212	71-75	M	no pre-vax covid	0	no	2	not detected	not detected	NA	NA	NA	NA	NA	NA	NA	NA	NA	NA	NA	NA	NA	NA	NA
213	86-90	M	pre-vax symptomatic covid	1	yes	2	detected	detected	detected	not detected	0.300262304	detected	<900	7-899	detected	detected	199.7114708	detected	5680	>=900	>=5680	99.98272557	96.65116279
214	81-85	M	pre-vax symptomatic covid	1	yes	2	detected	detected	detected	detected	65.33568509	detected	<900	7-899	NA	NA	NA	NA	NA	NA	NA	NA	NA
215	81-85	M	pre-vax seropositivity	1	yes	2	detected	detected	detected	detected	5.467909355	detected	<900	7-899	detected	detected	168.7631836	detected	2803.75	>=900	900-5679	99.99314524	99.24761568
216	71-75	M	no pre-vax covid	0	no	2	not detected	not detected	not detected	not detected	0.1	not detected	<900	<7	not detected	detected	128.3198637	detected	178.47	<900	7-899	83.67344552	14.62790698
217	71-75	M	pre-vax seropositivity	1	yes	2	not detected	detected	not detected	NA	NA	not detected	<900	<7	not detected	detected	169.9437996	detected	1228.55	>=900	900-5679	99.98355553	18.47209302
218	76-80	M	pre-vax seropositivity	1	yes	2	detected	detected	not detected	detected	11.96025226	NA	NA	NA	not detected	detected	203.3604048	detected	5680	>=900	>=5680	99.98244695	89.65741858
219	86-90	M	pre-vax seropositivity	1	yes	2	detected	detected	not detected	NA	NA	NA	NA	NA	not detected	detected	136.9144462	detected	5680	>=900	>=5680	99.99005011	99.33239138
220	81-85	M	pre-vax symptomatic covid	1	yes	2	detected	detected	detected	NA	NA	NA	NA	NA	detected	detected	179.8824493	detected	5680	>=900	>=5680	99.96272702	99.44365948
221	66-70	M	pre-vax seropositivity	1	yes	2	detected	detected	not detected	detected	23.07008982	NA	NA	NA	not detected	detected	202.6331708	detected	2941.07	>=900	900-5679	99.96396945	98.03255814
222	86-90	M	no pre-vax covid	0	no	2	not detected	not detected	not detected	not detected	0.1	NA	NA	NA	NA	NA	NA	NA	NA	NA	NA	NA	NA
223	76-80	M	pre-vax seropositivity	1	yes	2	detected	detected	detected	detected	11.77277023	NA	NA	NA	detected	detected	204.3275171	detected	5680	>=900	>=5680	99.97826765	99.32325581
224	71-75	M	pre-vax seropositivity	1	yes	2	detected	detected	not detected	detected	16.8510954	NA	NA	NA	not detected	detected	204.8623796	detected	4038.55	>=900	900-5679	99.97986332	98.55247286
225	76-80	F	no pre-vax covid	0	no	2	not detected	not detected	not detected	NA	NA	NA	NA	NA	not detected	detected	171.0829727	detected	438.7	<900	7-899	99.23338153	85.99081597
226	>100	M	no pre-vax covid	0	no	2	not detected	not detected	not detected	NA	NA	NA	NA	NA	not detected	detected	28.02413507	detected	24.95	<900	7-899	86.31709017	45.29767442
227	71-75	M	pre-vax seropositivity	1	yes	1	not detected	not detected	detected	NA	NA	NA	NA	NA	detected	detected	167.4214782	detected	2114.63	>=900	900-5679	99.9851458	97.98793727
228	81-85	M	no pre-vax covid	0	no	2	not detected	not detected	not detected	NA	NA	NA	NA	NA	not detected	detected	186.3894026	detected	334.49	<900	7-899	93.89759061	87.45849523
229	86-90	M	no pre-vax covid	0	no	2	not detected	not detected	NA	NA	NA	NA	NA	NA	NA	NA	NA	NA	NA	NA	NA	NA	NA
230	81-85	M	pre-vax symptomatic covid	1	yes	2	detected	detected	NA	NA	NA	NA	NA	NA	NA	NA	NA	NA	NA	NA	NA	NA	NA
231	76-80	M	no pre-vax covid	0	no	2	not detected	not detected	not detected	NA	NA	NA	NA	NA	not detected	NA	NA	detected	26.04	<900	7-899	NA	NA
232	71-75	M	no pre-vax covid	0	no	1	not detected	not detected	not detected	NA	NA	NA	NA	NA	not detected	detected	2.56664801	detected	18.11	<900	7-899	88.28675894	15.40974921
233	81-85	M	pre-vax symptomatic covid	1	yes	2	detected	detected	NA	NA	NA	NA	NA	NA	not detected	detected	138.8233284	detected	5680	>=900	>=5680	99.89553408	99.55492759
234	76-80	M	pre-vax symptomatic covid	1	yes	2	not detected	detected	not detected	NA	NA	NA	NA	NA	not detected	detected	151.6394626	detected	1580.26	>=900	900-5679	99.98800417	91.73255814
235	71-75	M	no pre-vax covid	0	no	2	not detected	not detected	not detected	NA	NA	NA	NA	NA	NA	NA	NA	NA	NA	NA	NA	NA	NA
236	86-90	M	pre-vax symptomatic covid	1	yes	2	detected	detected	detected	NA	NA	NA	NA	NA	detected	detected	186.0468248	detected	5680	>=900	>=5680	99.98550657	98.53799759
237	86-90	M	no pre-vax covid	0	no	2	not detected	not detected	not detected	NA	NA	NA	NA	NA	not detected	NA	NA	detected	960.29	>=900	900-5679	NA	NA
238	81-85	M	no pre-vax covid	0	no	2	not detected	not detected	not detected	NA	NA	NA	NA	NA	not detected	detected	191.091104	detected	990.3	>=900	900-5679	99.70326958	96.49069767
239	86-90	M	no pre-vax covid	0	no	2	not detected	not detected	not detected	NA	NA	NA	NA	NA	not detected	detected	177.9941263	detected	731.33	<900	7-899	98.43238721	89.86731001
240	91-95	M	pre-vax seropositivity	1	yes	2	not detected	not detected	detected	detected	81.8156124	NA	NA	NA	not detected	detected	154.3876549	detected	1019.07	>=900	900-5679	99.97696871	76.88299156
241	81-85	M	pre-vax symptomatic covid	1	yes	2	detected	detected	NA	NA	NA	NA	NA	NA	NA	NA	NA	NA	NA	NA	NA	NA	NA
242	86-90	M	pre-vax symptomatic covid	1	yes	2	detected	detected	not detected	not detected	1.036394685	detected	<900	7-899	NA	NA	NA	NA	NA	NA	NA	NA	NA
243	96-100	M	pre-vax seropositivity	1	yes	2	detected	detected	detected	detected	6.923557848	detected	<900	7-899	NA	NA	NA	NA	NA	NA	NA	NA	NA
244	86-90	M	no pre-vax covid	0	no	2	NA	NA	not detected	not detected	0.1	not detected	<900	<7	NA	NA	NA	NA	NA	NA	NA	NA	NA
245	96-100	M	no pre-vax covid	0	no	2	not detected	not detected	not detected	not detected	0.1	not detected	<900	<7	NA	NA	NA	NA	NA	NA	NA	NA	NA
246	91-95	M	pre-vax seropositivity	1	yes	2	detected	detected	detected	detected	3.255750823	detected	<900	7-899	NA	NA	NA	NA	NA	NA	NA	NA	NA
247	>100	M	no pre-vax covid	0	no	2	not detected	not detected	NA	NA	NA	NA	NA	NA	NA	NA	NA	NA	NA	NA	NA	NA	NA
248	86-90	M	pre-vax seropositivity	1	yes	2	detected	detected	detected	detected	5.991596697	not detected	<900	<7	NA	NA	NA	NA	NA	NA	NA	NA	NA
249	96-100	M	pre-vax symptomatic covid	0	no	2	not detected	not detected	NA	NA	NA	NA	NA	NA	NA	NA	NA	NA	NA	NA	NA	NA	NA
250	91-95	M	pre-vax symptomatic covid	0	no	2	NA	NA	not detected	not detected	0.1	not detected	<900	<7	NA	NA	NA	NA	NA	NA	NA	NA	NA
251	76-80	M	no pre-vax covid	0	no	2	NA	NA	not detected	NA	NA	NA	NA	NA	detected	detected	130.7758287	detected	1281.91	>=900	900-5679	99.98555841	97.43787696
252	66-70	M	no pre-vax covid	0	no	2	not detected	not detected	not detected	not detected	0.1	not detected	<900	<7	NA	NA	NA	NA	NA	NA	NA	NA	NA
253	76-80	M	no pre-vax covid	0	no	2	NA	NA	not detected	not detected	0.1	not detected	<900	<7	not detected	detected	205.5777082	detected	476.8	<900	7-899	93.02280225	68.42635111
254	86-90	M	pre-vax symptomatic covid	NA	NA	2	NA	NA	NA	NA	NA	NA	NA	NA	detected	detected	146.4614021	detected	1369.24	>=900	900-5679	99.98628997	95.65348837
255	66-70	M	no pre-vax covid	0	no	2	NA	NA	not detected	not detected	0.1	not detected	<900	<7	NA	NA	NA	NA	NA	NA	NA	NA	NA
256	71-75	M	no pre-vax covid	0	no	2	NA	NA	not detected	not detected	0.1	not detected	<900	<7	not detected	detected	170.7390807	detected	425.59	<900	7-899	92.4020383	90.85348837
257	76-80	M	no pre-vax covid	0	no	2	NA	NA	not detected	not detected	0.1	not detected	<900	<7	not detected	detected	NA	detected	491.85	<900	7-899	97.60573058	NA
258	86-90	M	pre-vax seropositivity	1	yes	2	NA	NA	detected	detected	67.2992409	detected	>=900	900-5679	detected	NA	NA	detected	5680	>=900	>=5680	NA	NA
259	81-85	M	no pre-vax covid	0	no	2	NA	NA	not detected	not detected	0.95748502	not detected	<900	<7	not detected	detected	151.9922491	detected	1260.68	>=900	900-5679	99.68942137	86.89767442
260	91-95	M	no pre-vax covid	0	no	2	NA	NA	not detected	not detected	0.1	not detected	<900	<7	NA	NA	NA	NA	NA	NA	NA	NA	NA
261	81-85	M	pre-vax seropositivity	1	yes	2	NA	NA	not detected	detected	18.52930378	detected	<900	7-899	not detected	detected	203.380096	detected	4135.35	>=900	900-5679	99.95143507	98.97739315
262	76-80	M	pre-vax seropositivity	1	yes	2	NA	NA	detected	NA	NA	detected	<900	7-899	detected	detected	110.8505327	detected	3718.73	>=900	900-5679	99.98531123	99.16976744
263	66-70	M	no pre-vax covid	0	no	2	NA	NA	not detected	not detected	0.1	not detected	<900	<7	not detected	detected	199.3058085	detected	445.66	<900	7-899	97.87972639	48.70697674
264	86-90	M	no pre-vax covid	0	no	2	NA	NA	not detected	not detected	0.1	not detected	<900	<7	not detected	detected	196.7747318	detected	2976.98	>=900	900-5679	99.98365376	94.82325581
265	81-85	M	pre-vax seropositivity	1	yes	2	NA	NA	not detected	detected	2.934797662	not detected	<900	<7	NA	NA	NA	NA	NA	NA	NA	NA	NA
266	66-70	M	no pre-vax covid	0	no	2	NA	NA	not detected	not detected	0.1	not detected	<900	<7	not detected	detected	180.5804789	detected	1499.59	>=900	900-5679	99.97968054	95.82479689
267	66-70	M	no pre-vax covid	NA	NA	2	NA	NA	NA	detected	132.1215378	NA	NA	NA	not detected	detected	NA	detected	2234.67	>=900	900-5679	99.92720214	98.07665136
268	76-80	M	pre-vax seropositivity	1	yes	2	NA	NA	not detected	detected	14.64296535	detected	<900	7-899	NA	NA	NA	NA	NA	NA	NA	NA	NA
269	91-95	F	no pre-vax covid	0	no	2	NA	NA	not detected	not detected	0.1	not detected	<900	<7	not detected	detected	206.0958874	detected	246.28	<900	7-899	88.154335	87.69692688
270	76-80	M	pre-vax seropositivity	1	yes	2	NA	NA	detected	detected	72.95624559	detected	<900	7-899	detected	detected	179.9521307	detected	5680	>=900	>=5680	99.88097698	99.41716708
271	76-80	M	pre-vax seropositivity	1	yes	2	NA	NA	detected	detected	62.00572136	NA	NA	NA	not detected	detected	180.5259738	detected	1850.63	>=900	900-5679	99.90512317	95.59767442
272	71-75	M	no pre-vax covid	0	no	2	NA	NA	not detected	not detected	0.1	not detected	<900	<7	not detected	detected	170.2237593	detected	923.63	>=900	900-5679	97.79657376	97.64747439
273	86-90	F	pre-vax seropositivity	1	yes	2	NA	NA	not detected	not detected	1.036394685	detected	<900	7-899	not detected	detected	205.7370091	detected	5680	>=900	>=5680	99.94377992	98.7654539
274	76-80	M	no pre-vax covid	NA	NA	2	NA	NA	NA	NA	NA	NA	NA	NA	NA	NA	NA	NA	NA	NA	NA	NA	NA
275	81-85	M	no pre-vax covid	0	no	2	NA	NA	not detected	not detected	0.1	not detected	<900	<7	not detected	detected	135.4639552	detected	163.06	<900	7-899	90.35832229	67.73225009
276	66-70	M	no pre-vax covid	0	no	2	NA	NA	not detected	not detected	0.1	not detected	<900	<7	not detected	detected	204.2286218	detected	1433.27	>=900	900-5679	99.46498634	93.42093023
277	66-70	M	pre-vax seropositivity	1	yes	2	NA	NA	not detected	detected	2.623316211	not detected	<900	<7	not detected	detected	205.7170897	detected	1344.53	>=900	900-5679	99.92720214	71.77906977
278	86-90	M	no pre-vax covid	0	no	2	NA	NA	not detected	not detected	0.1	not detected	<900	<7	not detected	detected	204.8425449	detected	1303.24	>=900	900-5679	98.87576899	98.10314377
279	86-90	M	no pre-vax covid	NA	NA	2	NA	NA	NA	NA	NA	NA	NA	NA	NA	NA	NA	NA	NA	NA	NA	NA	NA
280	76-80	M	no pre-vax covid	NA	NA	1	NA	NA	NA	NA	NA	NA	NA	NA	not detected	NA	NA	detected	17.07	<900	7-899	NA	NA
